# Supplementary material
Source: PubMed Central journal article supplement (PMC3400982)
Supplement: 97320630008595S1.pdf [file 97320630008595S1.pdf]

## Supplementary material:

**Table 1:** Functional annotation of drought responsive proteins and their identified *MICA* terms

| Spot | Protein name                                   | Gene Ontology                                                                                                                                         | Protein family                                            | MICA term                                                                       |
|------|------------------------------------------------|-------------------------------------------------------------------------------------------------------------------------------------------------------|-----------------------------------------------------------|---------------------------------------------------------------------------------|
| S1   | Putative uncharacterized protein (Sb02g009790) | [calcium ion binding (GO:0005509)]<br>[ATP binding (GO:0005524)]<br>[protein serine/threonine kinase activity (GO:0004674)]                           | Protein kinase, catalytic domain                          | [M1 (catalytic activity)]<br>[M2 (binding)]                                     |
| S2   | Putative uncharacterized protein (Sb08g020040) | [ATP binding (GO:0005524)]<br>[protein serine/threonine kinase activity (GO:0004674)]                                                                 | Serine-threonine/tyrosine-protein kinase catalytic domain | [M1 (catalytic activity)]<br>[M2 (binding)]                                     |
| S3   | Putative uncharacterized protein (Sb01g011370) | [Apoplast (GO:0048046)]<br>[manganese ion binding (GO:0030145)]<br>[nutrient reservoir activity (GO:0045735)]                                         | Cupin 1                                                   | [M2 (binding)]                                                                  |
| S4   | Putative uncharacterized protein (Sb01g018400) | [carbohydrate metabolic process (GO:0005975)]<br>[cation binding (GO:0043169)]<br>[hydrolase activity, hydrolyzing O-glycosyl compounds (GO:0004553)] | Glycoside hydrolase                                       | [M1 (catalytic activity)]<br>[M2 (binding)]<br>[M3 (primary metabolic process)] |
| S5   | Putative uncharacterized protein (Sb07g021920) | [trehalose biosynthetic process (GO:0005992)]<br>[catalytic activity (GO:0003824)]                                                                    | Glycosyl transferase family-20; Trehalose-phosphatase     | [M3 (primary metabolic process)]                                                |
| S6   | Putative uncharacterized protein (Sb03g004540) | [carbohydrate metabolic process (GO:0005975)]<br>[galactinol-sucrose galactosyltransferase activity (GO:0047274)]                                     | Raffinose synthase                                        | [M1 (catalytic activity)]<br>[M3 (primary metabolic process)]                   |

**Table 2:** GO term's semantic similarities and distance values for shortest paths from root terms molecular function (MF), biological process (BP) and cellular component (CC) to their associated terms

| (n <sub>1</sub> ) GO:0004553                                                                                                                                                                                                                   | (n <sub>2</sub> ) GO:0047274                                                                                                                                                | (n <sub>3</sub> ) GO:0004674                                                                                                                                                      |
|------------------------------------------------------------------------------------------------------------------------------------------------------------------------------------------------------------------------------------------------|-----------------------------------------------------------------------------------------------------------------------------------------------------------------------------|-----------------------------------------------------------------------------------------------------------------------------------------------------------------------------------|
| GO:0003674-GO:0003824=1.3<br>GO:0003824-GO:0016787=3.6<br>GO:0016787-GO:0016798=7.9<br>GO:0016798-GO:0004553=0.6                                                                                                                               | GO:0003674-GO:0003824=1.3<br>GO:0003824-GO:0016740=3.8<br>GO:0016740-GO:0016757=8.4<br>GO:0016757-GO:0016758=2.9<br>GO:0016758-GO:0008378=9.5<br>GO:0008378-GO:0047274=16.6 | GO:0003674-GO:0003824=1.3<br>GO:0003824-GO:0016740=3.8<br>GO:0016740-GO:0016772=2.2<br>GO:0016772-GO:0016773=3.3<br>GO:0016773-GO:0004672=1.5<br>GO:0004672-GO:0004674=3.1        |
| arctan= 13.4<br>distance=arctan×π/2=21.03                                                                                                                                                                                                      | arctan= 42.5<br>distance=arctan×π/2=66.72                                                                                                                                   | arctan=15.2<br>distance=arctan×π/2=23.86                                                                                                                                          |
| <b>(n<sub>4</sub>) GO:0030145</b><br>GO:0003674-GO:0005488=1.6<br>GO:0005488-GO:0043167=4<br>GO:0043167-GO:0043169=0.0<br>GO:0043169-GO:0046872=0.1<br>GO:0046872-GO:0046914=1.7<br>GO:0046914-GO:0030145=11.3                                 | <b>(n<sub>5</sub>) GO:0043169</b><br>GO:0003674-GO:0005488=1.6<br>GO:0005488-GO:0043167=4<br>GO:0043167-GO:0043169=0.0                                                      | <b>(n<sub>6</sub>) GO:0005509</b><br>GO:0003674-GO:0005488=1.6<br>GO:0005488-GO:0043167=4<br>GO:0043167-GO:0043169=0.0<br>GO:0043169-GO:0046872=0.1<br>GO:0046872-GO:0005509=10.7 |
| arctan=18.7<br>distance=arctan×π/2=29.35                                                                                                                                                                                                       | arctan=5.6<br>distance=arctan×π/2=8.79                                                                                                                                      | arctan=16.4<br>distance=arctan×π/2=25.74                                                                                                                                          |
| <b>(n<sub>7</sub>) GO:0005524</b><br>GO:0003674-GO:0005488=1.6<br>GO:0005488-GO:0000166=3.7<br>GO:0000166-GO:0032553=0.7<br>GO:0032553-GO:0032555=0.0<br>GO:0032555-GO:0032559=0.4<br>GO:0032559-GO:0005524=0.0                                | <b>(n<sub>8</sub>) GO:0045735</b><br>GO:0003674-GO:0045735=23.9                                                                                                             | <b>(n<sub>9</sub>) GO:0005975</b><br>GO:0008150-GO:0008152=0.9<br>GO:0008152-GO:0044238=1.3<br>GO:0044238-GO:0005975=6.3                                                          |
| arctan=6.4<br>distance=arctan×π/2=10.04                                                                                                                                                                                                        | arctan=23.9<br>distance=arctan×π/2=37.52                                                                                                                                    | arctan=8.5<br>distance=arctan×π/2=13.34                                                                                                                                           |
| <b>(n<sub>10</sub>) GO:0005992</b><br>GO:0008150-GO:0008152=0.9<br>GO:0008152-GO:0044238=1.3<br>GO:0044238-GO:0005975=6.3<br>GO:0005975-GO:0009311=11.7<br>GO:0009311-GO:0009312=1.8<br>GO:0009312-GO:0046351=2.5<br>GO:0046351-GO:0005992=0.3 | <b>(n<sub>11</sub>) GO:0048046</b><br>GO:0005575-GO:0005576=8.4<br>GO:0005576-GO:0048046=6.6                                                                                |                                                                                                                                                                                   |
| arctan=24.8<br>distance=arctan×π/2=38.93                                                                                                                                                                                                       | arctan=15<br>distance=arctan×π/2=23.55                                                                                                                                      |                                                                                                                                                                                   |
